# Supplementary material for: The role of the PIK3CA gene in the development and aging of the brain
Source: PubMed Central journal article supplement (PMC7801510; doi:10.1038/s41598-020-79416-6), 2021-01-11
Supplement: 41598_2020_79416_MOESM1_ESM.pdf [file 41598_2020_79416_MOESM1_ESM.pdf]

***Supplementary materials***

The role of the *PIK3CA* gene in the development and aging of the brain

Shaozhen Xie<sup>1,2,3</sup>, Jing Ni<sup>1,2,3</sup>, Hanbing Guo<sup>1,2</sup>, Victor Luu<sup>1,2</sup>, Yanzhi Wang<sup>1,2</sup>, Jean J. Zhao<sup>1,2,\*</sup>,

Thomas M. Roberts<sup>1,2,\*</sup>

<sup>1</sup>Department of Cancer Biology, Dana-Farber Cancer Institute, Boston, MA 02215, USA.

<sup>2</sup>Department of Biological Chemistry and Molecular Pharmacology, Harvard Medical School,  
Boston, MA 02115, USA

<sup>3</sup>These authors contributed equally

\*Correspondence to: Jean J. Zhao (email: [jean\\_zhao@dfci.harvard.edu](mailto:jean_zhao@dfci.harvard.edu)); and Thomas M.

Roberts, PhD (email: [thomas\\_roberts@dfci.harvard.edu](mailto:thomas_roberts@dfci.harvard.edu))

## SUPPLEMENTARY FIGURES

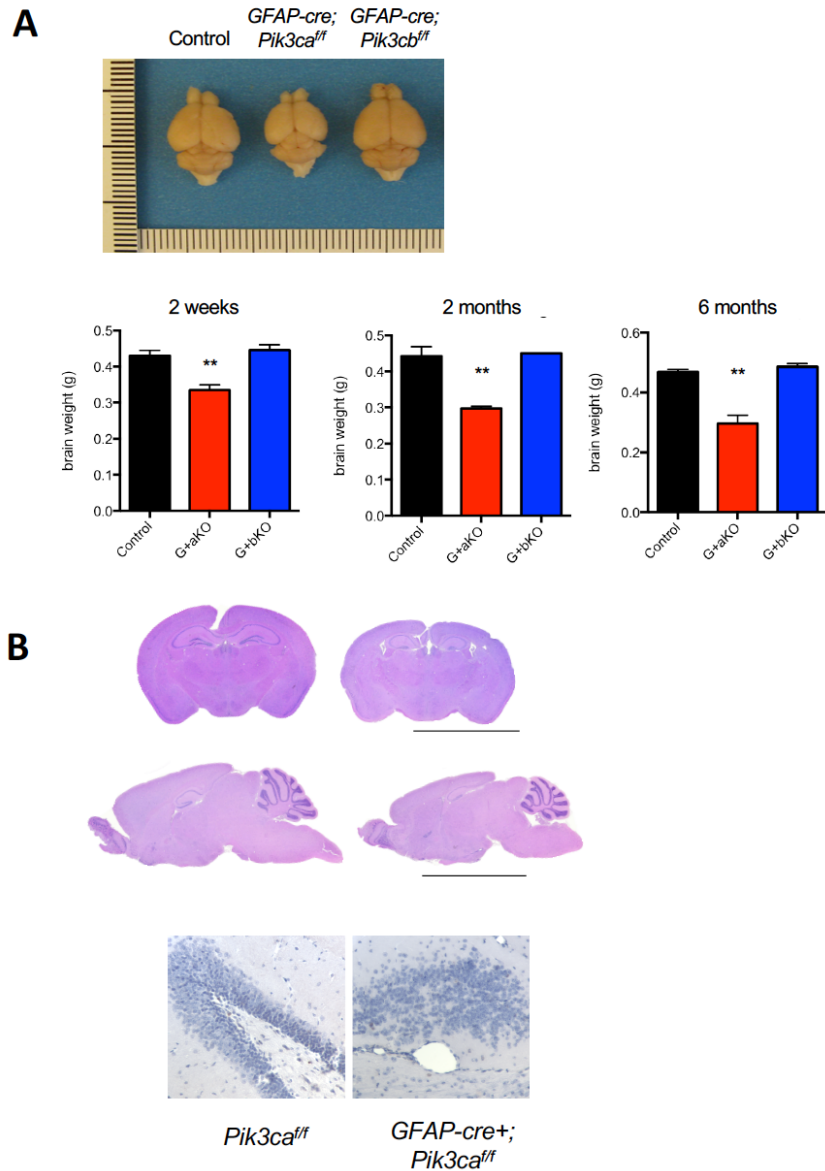

**Supplementary Figure 1.** The mice with brain-specific 110 $\alpha$  knockout, but not p110 $\beta$ , have significantly smaller and abnormal brains. (A) Overall brain picture and brain weight of *GFAPcre;Pik3ca<sup>ff</sup>* mice (red bar), *GFAPcre;Pik3cb<sup>ff</sup>* mice (blue bar), or wild type control mice (black line) at different ages. Bars represents mean  $\pm$  SEM ( $n \geq 5$ ). (B) H&E staining of coronal sections (upper panel, 12 months old), sagittal sections (middle panel, 2 months old), and hippocampus region (lower panel) of the mouse brain tissue. Scale bar, 5 mm

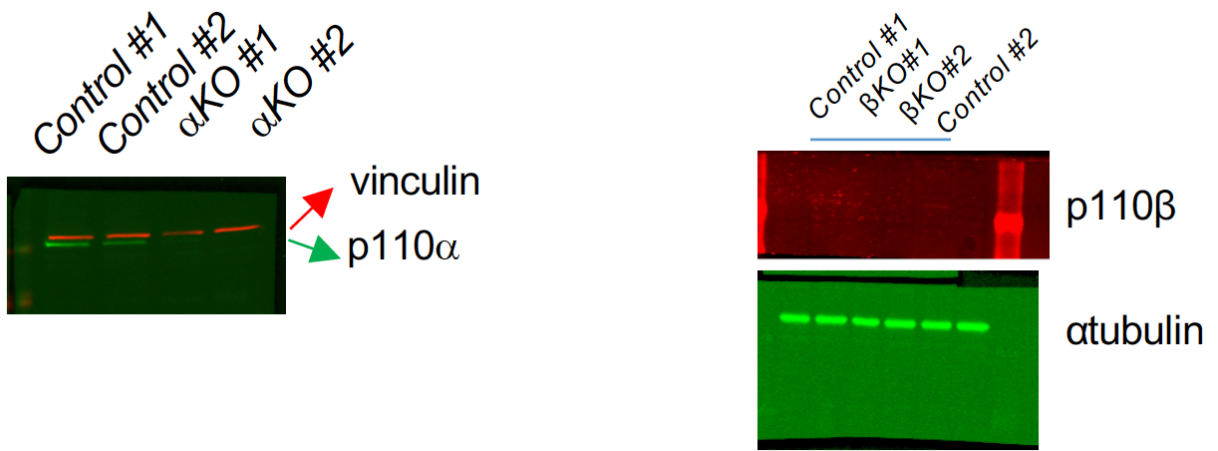

**Supplementary Figure 2.** Uncropped images from Western blot related to Figure 4A

**A**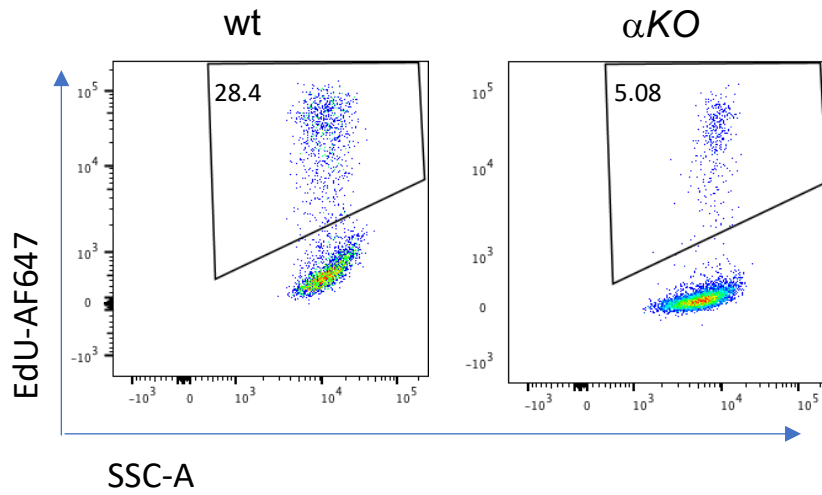**B**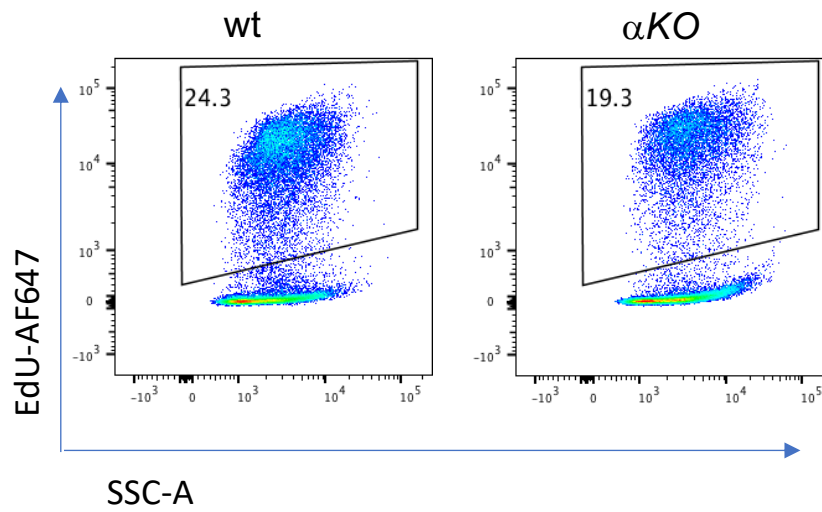

**Supplementary Figure 3.** Flow cytometry analysis of EdU incorporation in NSC/NPCs *in vitro* and *in vivo*. Representative plots for cell subset of EdU+ cells *in vitro* (A, related to Figure 4C) and *in vivo* (B, related to Figure 4D).

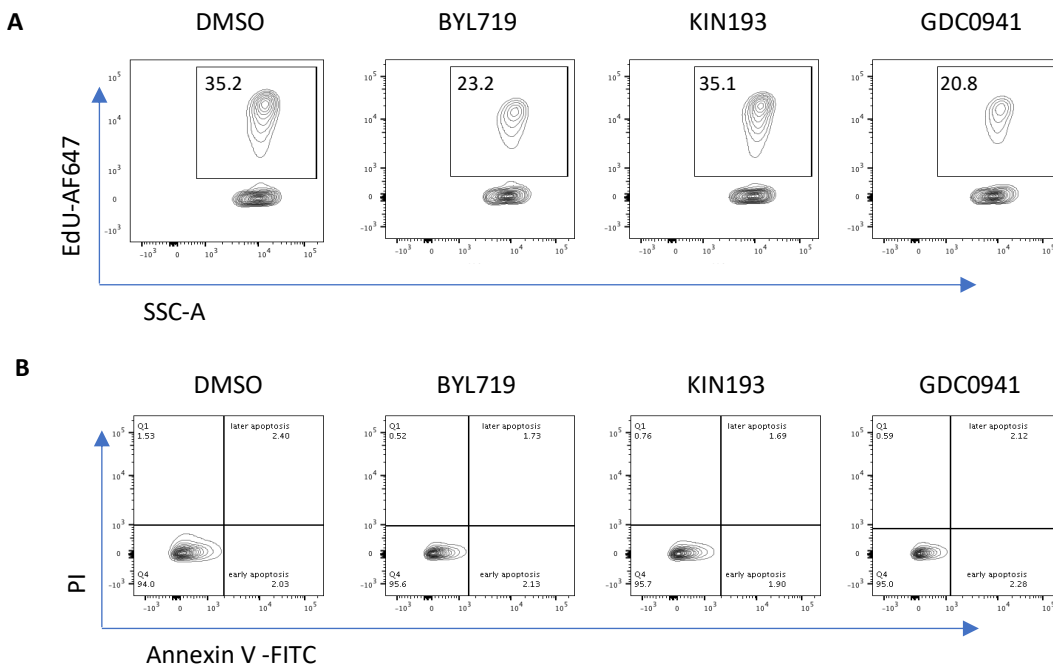

**Supplementary Figure 4.** Flow cytometry analysis of EdU incorporation (A) and AnnexinV/PI apoptosis (B) in wild type NSC/NPCs with indicated PI3K inhibitors treatment. Representative plots of cell subset of NSC/NPCs related to Figure 4F and 4G.
